# Supplementary material for: Repression of COUP-TFI Improves Bone Marrow-Derived Mesenchymal Stem Cell Differentiation into Insulin-Producing Cells
Source: PubMed Central journal article supplement — Mol Ther Nucleic Acids. 2017 Jun 23;8:220–31. doi: 10.1016/j.omtn.2017.06.016 (PMC5504083; doi:10.1016/j.omtn.2017.06.016), 2017-06-23
Supplement: mmc1.pdf [file mmc1.pdf]

OMTN, Volume 8

## **Supplemental Information**

### **Repression of COUP-TFI Improves Bone Marrow-Derived Mesenchymal Stem Cell Differentiation into Insulin-Producing Cells**

**Tao Zhang, Xiao-Hang Li, Dian-Bao Zhang, Xiao-Yu Liu, Feng Zhao, Xue-Wen Lin, Rui Wang, Hong-Xin Lang, and Xi-Ning Pang**

**Supplementary Figure 1. Characterization of bmMSCs *in vitro*.** (a) Phenotype of bmMSCs by flow cytometry analysis. bmMSCs were harvested and labeled with antibodies against Sca-1, CD44, CD29, CD31, CD117 and CD45. (b) bmMSCs were cultured in chondrogenic differentiation medium for 3 weeks. When cell pellet was formed, the pellet was fixed and sectioned at 8  $\mu\text{m}$  with cryostat microtome. The slices were stained with alcian blue solution. Scale bar = 200  $\mu\text{m}$ . (c) The bmMSCs were cultured in osteogenic differentiation medium for 3 weeks and stained with Alizarin red. Scale bar = 100  $\mu\text{m}$ . (d) bmMSCs were cultured in adipogenic differentiation medium for 4 weeks and stained with Oil red O. Scale bar = 20  $\mu\text{m}$ . (e) bmMSCs were cultured in normal medium for 3 weeks and stained with alcian blue solution. Scale bar = 100  $\mu\text{m}$ . (f) bmMSCs were cultured in normal medium for 3 weeks and stained with Alizarin red. Scale bar = 100  $\mu\text{m}$ . (g) bmMSCs were cultured in normal medium for 4 weeks and stained with Oil red O. Scale bar = 100  $\mu\text{m}$ .

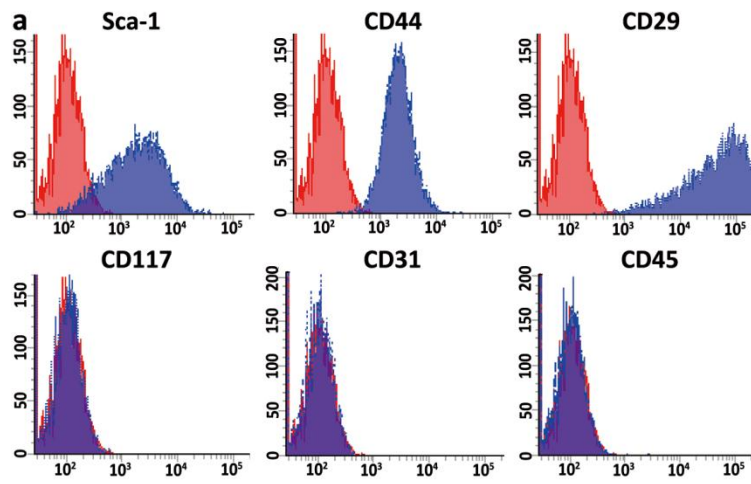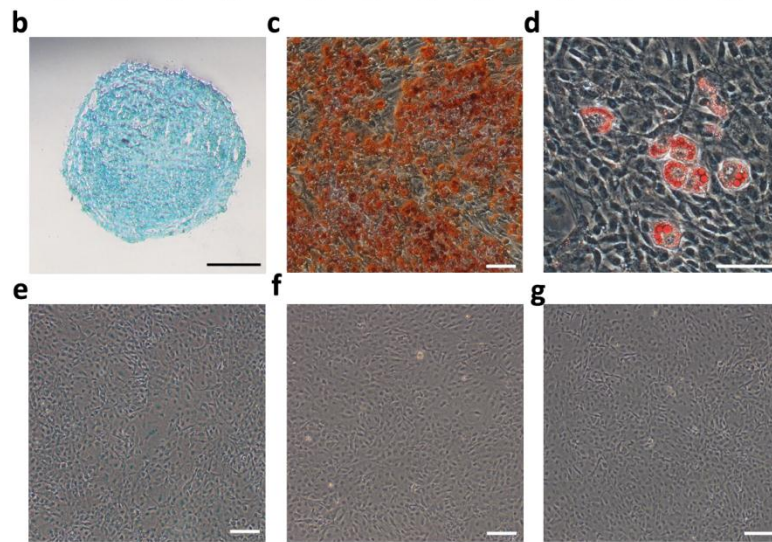

**Supplementary Table 1. Primers sequences used in our research.**

| <b>Primer used for RT-qPCR</b> |                             |                               |
|--------------------------------|-----------------------------|-------------------------------|
| Gene symbol                    | Forward primer (5'-3')      | Reverse primer (5'-3')        |
| GAPDH                          | TTCACCACCATGGAGAAGGC        | CCCTTTTGGCTCCACCCT            |
| Ins1                           | GAAGCGTGGCATTGTGGAT         | TGGGCCTTAGTTGCAGTAGTTCT       |
| Ins2                           | AGCCCTAAGTGATCCGCTACA<br>A  | CATGTTGAAACAATAACCTGGA<br>AGA |
| Pdx1                           | CCCCAGTTTACAAGCTCGCT        | CTCGGTTCCATTCGGGAAAGG         |
| Isl1                           | ATGATGGTGGTTTACAGGCTA<br>AC | TCGATGCTACTTCACTGCCAG         |
| Pax6                           | CCCTCACCAACACGTACAG         | TCATAACTCCGCCCATTCAC          |
| Glut2                          | ACTTGGAAGGATCAAAGCAAT<br>GT | CAGTCCTGAAATTAGCCCACAA        |
| Glucagon                       | TTACTTTGTGGCTGGATTGCTT      | AGTGGCGTTTGTCTTCATTCA         |
| Crabp1                         | CGCACCACGGAGATCAACTT        | TGTCTCCTCCTCGAAGCCCT          |
| Casq1                          | GACGCGGACAGCATATGGAT        | AGAAGGCAGGTCCTCCTCGT          |
| Ehhadh                         | ATGGCTGAGTATCTGAGGCTG       | GGTCCAAACTAGCTTTCTGGAG        |
| Camk4                          | GAGAACCTCGTCCCGGATTAC       | ACACAATGGATGTAGCACCCC         |
| Sod1                           | GTGCAGGGAACCATCCACTT        | CACAACTGGTTCACCGCTTG          |

|                                              |                             |                        |
|----------------------------------------------|-----------------------------|------------------------|
| Myog                                         | GAGACATCCCCCTATTTCTACC<br>A | GCTCAGTCCGCTCATAGCC    |
| Foxo3a                                       | CTCAAAGTCTGGGTACCAGGC       | GCCCATTGCCCTTTCCTC     |
| Fabp7                                        | GGACACAATGCACATTCAAGA<br>AC | CCGAACCACAGACTTACAGTTT |
| Pck1                                         | CTGCATAACGGTCTGGACTTC       | CAGCAACTGCCCGTACTCC    |
| MR1                                          | CCTACCAGAGAATGATTGGCT<br>G  | GCAACTCATGCAGGTTGGC    |
| BMP4                                         | TTCCTGGTAACCGAATGCTGA       | CCTGAATCTCGGCGACTTTTT  |
| HGF                                          | ATGTGGGGGACCAAACCTTCTG      | GGATGGCGACATGAAGCAG    |
| MTTP                                         | CTCTTGGCAGTGCTTTTTCTCT      | GAGCTTGTATAGCCGCTCATT  |
| OCT4                                         | AGAGGATCACCTTGGGGTACA       | CGAAGCGACAGATGGTGGTC   |
| Aldh2                                        | GACGCCGTCAGCAGGAAAA         | CGCCAATCGGTACAACAGC    |
| <b>Primer used for Semi-quantitative PCR</b> |                             |                        |
| Gene<br>symbol                               | Forward primer (5'-3')      | Reverse primer (5'-3') |
| COUP-TF<br>I                                 | CCTCCTCTGTCATCGAGCAA        | TCCATCATAACCAGCATCCCC  |
| GAPDH                                        | ACCACAGTCCATGCCATCAC        | TCCACCACCCTGTTGCTGTA   |
| <b>Primer used for ChIP</b>                  |                             |                        |

|                                                          |                                           |                                             |
|----------------------------------------------------------|-------------------------------------------|---------------------------------------------|
| Gene symbol                                              | Forward primer (5'-3')                    | Reverse primer (5'-3')                      |
| ChIP DR1 site                                            | GGACTAAGTAGAGGTGTTGAC<br>G                | CTGGACTTTGCTGTTTGACC                        |
| ChIP Negative Control                                    | CTTGAACCTAACTGCTTGG                       | AGGCACTCTGTTGAGATT                          |
| <b>Primers used for vectors construction</b>             |                                           |                                             |
| Gene symbol                                              | Forward primer (5'-3')                    | Reverse primer (5'-3')                      |
| pMD-100<br>0                                             | ACACTGCCCTGATCTTCTTACC                    | GCTTGCTGATGGTTTTTGATTGT                     |
| pCDH-C<br>OUP-TFI                                        | CGGAATTCGCCACCATGGCAA<br>TGGTAGTTAGCAGCTG | ATAAGAATGCGGCCGCGGAACA<br>CTGGATGGACATGTAAG |
| pCDH-Ma<br>fA                                            | GCTCTAGAGCCACCATGGCCG<br>CGGAGCTGGCGATG   | CGCGGATCCCAGAAAGAAGTCG<br>GGTGCGCC          |
| pGL3-Ins<br>2                                            | CGACGCGTGGAGGGACCATTA<br>AGTGCCT          | CCGCTCGAGCGGATCACTTAGG<br>GCTGGTG           |
| <b>Primers used for DNA affinity precipitation assay</b> |                                           |                                             |
| Gene                                                     | Forward primer (5'-3')                    | Reverse primer (5'-3')                      |

|                      |                            |                       |
|----------------------|----------------------------|-----------------------|
| symbol               |                            |                       |
| Biotinylated primers | GGAGGGACCATTAAGTGCCTT<br>G | CGGATCACTTAGGGCTGGTGG |
